# Supplementary material for: Phenogenomic heterogeneity of post-transplant plasmablastic lymphomas
Source: PubMed Central journal article supplement — Haematologica. 2020 Dec 3;107(1):201–10. doi: 10.3324/haematol.2020.267294 (PMC8719101; doi:10.3324/haematol.2020.267294), 2020-12-03
Supplement: 2020_267294_LEEMAN-NEILL_SUPPL.pdf [file 2020_267294_LEEMAN-NEILL_SUPPL.pdf]

# Phenogenomic heterogeneity of post-transplant plasmablastic lymphomas

Rebecca J. Leeman-Neill,<sup>1</sup> Craig R. Soderquist,<sup>1,2</sup> Francesca Montanari,<sup>3</sup> Patricia Raciti,<sup>4</sup> David Park,<sup>1</sup> Dejan Radeski,<sup>5</sup> Mahesh M. Mansukhani,<sup>2</sup> Vundavalli V. Murty,<sup>6</sup> Susan Hsiao,<sup>2</sup> Bachir Alobeid<sup>1</sup> and Govind Bhagat<sup>1</sup>

<sup>1</sup>Department of Pathology and Cell Biology, Division of Hematopathology, Columbia University Irving Medical Center, NY Presbyterian Hospital, New York, NY, USA; <sup>2</sup>Department of Pathology and Cell Biology, Division of Personalized Genomic Medicine, Columbia University Irving Medical Center, NY Presbyterian Hospital, New York, NY, USA; <sup>3</sup>Department of Pathology and Cell Biology, Division of Hematology/Oncology, Columbia University Irving Medical Center, NY Presbyterian Hospital, New York, NY, USA; <sup>4</sup>Department of Pathology, Greenwich Hospital, Greenwich, CT, USA; <sup>5</sup>Department of Haematology, Sir Charles Gairdner Hospital, Perth, Australia; <sup>6</sup>Department of Medicine, Division of Cytogenetics, Columbia University Irving Medical Center, NY Presbyterian Hospital, New York, NY, USA

©2022 Ferrata Storti Foundation. This is an open-access paper. doi:10.3324/haematol.2020.267294

Received: July 17, 2020.

Accepted: November 25, 2020.

Pre-published: December 3, 2020.

Correspondence: REBECCA LEEMAN-NEILL - [rjl2165@cumc.columbia.edu](mailto:rjl2165@cumc.columbia.edu)

GOVIND BHAGAT - [gb96@cumc.columbia.edu](mailto:gb96@cumc.columbia.edu)

---

## **SUPPLEMENTARY MATERIAL**

### **SUPPLEMENTARY METHODS**

#### **Immunohistochemistry/in situ hybridization**

Immunohistochemistry was performed with the following panel of antibodies; CD45 (clone 2B11+PD7/26), PAX5 (clone 1EW), CD19 (clone CT 51E), CD20 (clone MJ1); CD10 (clone 56C6); BCL6 (clone LN22); BCL2 (clone D5); OCT2 (clone Oct 207), BOB1 (clone SP92), LMO2 (clone SP51), CD138 (clone BA38), CD43 (clone L60), CD56 (clone CD564), ALK (clone ALKO1), CD30 (clone BER-H2), P53 (clone Bp53-11), CD117 (clone CD117), LANA (clone HHV8-13B10), C-MYC, (clone Y69), all from Leica, Illinois, USA; CD79a (clone AP18); Cyclin D1 (clone SP4-R); CD138 (clone B-A38); Ki-67 (clone 30-9), MLH1 (clone M1), MSH6 (clone 44) all from Ventana, Arizona, USA; and MUM-1 (clone MUM1p) from DAKO, CA, USA; MSH2 (clone G219-1129) and PMS2 (clone EPR3947) both from Cell Marque, California, USA. In-situ hybridization was performed for EBER (clone EBV), kappa (clone ISH-5748A), and lambda (clone ISH-5770A) (Leica, Illinois, USA). Staining was performed with automated staining machines (Benchmark Ultra, Ventana, Arizona, USA and Bond III, Leica, Illinois, USA) and visualized with the ultraView Universal (Ventana, Arizona, USA) and Bond Polymer Refine (Leica, Illinois, USA) DAB detection kits according to the manufacturer's protocols. Expression of the following markers was quantified in deciles: P53, MYC, Ki-67, and PDL1 and positivity on neoplastic and non-neoplastic cells was recorded for the latter. The percentage of PD-1+ lymphoma infiltrating lymphocytes was graded semiquantitatively (rare <5%, mild 5-20%, moderate >20-50% and marked >50%). The cut-offs for MYC and P53 (aberrant nuclear) overexpression were  $\geq 40\%$  and  $\geq 30\%$  respectively.<sup>1-5</sup> Other markers were scored (–) if <10% of cells were positive, (-/+) if 10-20% were positive, (+/-) if >20-50% were positive, and (+) if >50% were positive. IHC for mismatch repair (MMR) proteins was performed only in cases that demonstrated microsatellite instability (MSI) based on genomic studies described below.

## **Flow cytometry**

Flow cytometric analysis was performed on lymphoma cell suspensions using FACScan (Becton Dickinson, San Diego, CA) after staining with a comprehensive panel of antibodies including those directed against B- and T-lineage antigens (CD20, CD19, CD79a, CD3), plasma cell markers (CD38, CD138), and others (CD10, CD56, CD117, CD30) according to standard procedures. Data were analyzed with FCS Express software (De Novo Software, Los Angeles, CA).

## **DNA extraction**

Tumor DNA was extracted from FFPE or fresh tissue depending on availability (Table 3) using the Qiam mini kit or the Qiam FFPE kit (Qiagen, Germantown, Maryland, USA). Non-tumor DNA was extracted from FFPE tissue samples from 9/11 patients.

## **Genomic sequencing and variant calling**

Briefly, library preparation was performed using the Sure Select Hybrid Capture system according to the manufacturers specifications (Agilent Technologies, Santa Clara, USA), with custom designed probes. Pooled libraries were sequenced using Illumina HiSeq2500 and Illumina TruSeq v3 chemistry (Illumina, San Diego, USA). Variant calling required at least 5% variant allelic fraction. Germline variants in the normal samples and variants with an allele prevalence >0.01% in gnomAD or “benign” or “likely benign” designation in ClinVar were excluded. Non-synonymous variants that were not known driver mutations were classified as likely pathogenic if the predictive score in two of three in silico algorithms exceeded the following thresholds: REVEL rank score > 0.8; MetaSVM score > 0.75, and CADD score > 25. MSI analysis of genomic data was performed using the RepeatFinder tool (MANTIS software 18).<sup>6</sup>

## **Microsatellite instability (MSI) analysis by PCR**

Microsatellite instability (MSI) testing was performed using a fluorescent PCR-based assay (MSI Analysis system, Version 1.2, Promega, Madison, WI). Briefly, this test assessed 5 mononucleotide repeats (BAT25, BAT26, NR-21, NR-24, and MONO-27) and 2 pentanucleotide repeats (PentaC and PentaD) on genomic DNA and matched normal, where available. The fluorescently labeled PCR products were analyzed by capillary gel electrophoresis. MSI was determined if the tumor alleles showed a size difference  $\geq 3$  bp. Tumors with 2 or more microsatellite unstable markers were classified as MSI-H.

### **Statistical analyses**

Differences in proportions between groups were assessed with the Fishers Exact test and differences in the number of genetic lesions between groups were analyzed with the nonparametric Mann-Whitney U test using R software (version 3.6.1).

## **SUPPLEMENTARY DATA**

### **Therapy and clinical outcomes**

The immunosuppressive regimens of the patients included different combinations of tacrolimus (n=6), azathioprine (n=8), mycophenolate mofetil (n=2), cyclosporine (n=6), and prednisone (n=9). In all patients, reduction of immunosuppression, including reduction of calcineurin inhibitors by at least 50% and discontinuation of antimetabolic agents (i.e. azathioprine and MMF) was implemented at the time of PTLD diagnosis.

Eight patients received various combinations of immunochemotherapy, including rituximab etoposide, vincristine, doxorubicin cyclophosphamide and prednisone (R-EPOCH), n=4; bortezomib-EPOCH followed by autologous stem cell transplant (ASCT), n=1; rituximab, cyclophosphamide and prednisone (R-CP) followed by fludarabine, cyclophosphamide and mitoxantrone (FCM) at relapse, n=1, cyclophosphamide/prednisolone (CP) followed by gemcitabine/oxaliplatin (GemOx) at progression, n=1; bortezomib/dexamethasone, n=1. Two

patients received external beam radiotherapy, including one who also received chemotherapy, and one underwent surgical resection for removal of PTLT after completing chemotherapy. Two patients presented with multiorgan failure and sepsis and did not receive any lymphoma-directed therapy. The median survival after diagnosis was 1.4 years (range 0-15.9 years) and 2 of 11 patients were alive at the most recent follow-up (15.9 and 6.0 years post diagnosis), including both pediatric patients in the series. Four patients died of PTLT, 4 of unrelated causes, and one of unknown causes.

1. Courville EL, Yohe S, Chou D, et al. EBV-negative monomorphic B-cell post-transplant lymphoproliferative disorders are pathologically distinct from EBV-positive cases and frequently contain TP53 mutations. *Mod Pathol*. 2016;29(10):1200-1211.
2. Xie Y, Bulbul MA, Ji L, et al. p53 Expression Is a Strong Marker of Inferior Survival in De Novo Diffuse Large B-Cell Lymphoma and May Have Enhanced Negative Effect With MYC Coexpression: A Single Institutional Clinicopathologic Study. *American Journal of Clinical Pathology*. 2014;141(4):593-604.
3. Xu-Monette ZY, Wu L, Visco C, et al. Mutational profile and prognostic significance of TP53 in diffuse large B-cell lymphoma patients treated with R-CHOP: report from an International DLBCL Rituximab-CHOP Consortium Program Study. *Blood*. 2012;120(19):3986-3996.
4. Johnson NA, Slack GW, Savage KJ, et al. Concurrent expression of MYC and BCL2 in diffuse large B-cell lymphoma treated with rituximab plus cyclophosphamide, doxorubicin, vincristine, and prednisone. *J Clin Oncol*. 2012;30(28):3452-3459.
5. Scott DW, Mottok A, Ennishi D, et al. Prognostic Significance of Diffuse Large B-Cell Lymphoma Cell of Origin Determined by Digital Gene Expression in Formalin-Fixed Paraffin-Embedded Tissue Biopsies. *J Clin Oncol*. 2015;33(26):2848-2856.
6. Pang J, Gindin T, Mansukhani M, Fernandes H, Hsiao S. Microsatellite instability detection using a large next-generation sequencing cancer panel across diverse tumour types. *J Clin Pathol*. 2020;73(2):83-89.

Table S1. Summary of all genetic variants detected in PT-PBLs

See separate Excel file

Table S2. Laboratory data and radiographic findings at diagnosis of PT-PBLs

| Patient | EBV serostatus before tx | EBV viremia at PTLD dx | Hgb (g/dL) | Ca (mg/dL) | Cr (mg/dL) | LDH (U/L) | Alb (g/dL) | $\beta$ 2M (mcg/ml) | SPEP                   | SFLC    | UPEP | Bone (lytic) lesions |
|---------|--------------------------|------------------------|------------|------------|------------|-----------|------------|---------------------|------------------------|---------|------|----------------------|
| 1       | Pos                      | No                     | 7.9        | 8.2        | 8.2        | 264       | 3.2        | ND                  | IgG $\lambda$ 1.2 g/dL | 2:80    | ND   | No                   |
| 2       | Pos                      | Yes                    | 11.5       | 7.1        | 0.7        | 167       | 3.3        | 3.5                 | IgM $\kappa$ 0.1 g/dL  | 2.1:4.4 | ND   | No                   |
| 3       | Pos                      | ND                     | 14.0       | 9.7        | 1.7        | 191       | 4.2        | 3.9                 | IgM $\kappa$ 0.4 g/dL  | ND      | ND   | No                   |
| 4       | Pos                      | Yes                    | 12.4       | 8.5        | 2.1        | 251       | 3.5        | 23.0                | IgA $\kappa$ 1.0 g/dL  | 55:4    | ND   | No                   |
| 5       | Neg                      | ND                     | 8.7        | 8.8        | 6.4        | 242       | 2.7        | ND                  | ND                     | ND      | ND   | No                   |
| 6       | ND                       | No                     | 11.0       | 8.6        | 0.7        | 127       | 2.6        | ND                  | ND                     | ND      | ND   | No                   |
| 7       | Pos                      | No                     | 11.1       | 8.3        | 1.3        | 149       | 4.0        | ND                  | Neg                    | ND      | ND   | No                   |
| 8       | Neg                      | Yes                    | 8.9        | 8.8        | 3.0        | 455       | 1.8        | 23.1                | Neg                    | ND      | ND   | No                   |
| 9       | ND                       | Yes                    | 10.7       | 8.5        | 1.5        | 1554      | 2.9        | ND                  | Neg                    | ND      | Neg  | No                   |
| 10      | Neg                      | Yes                    | 9.4        | 9          | 0.5        | 210       | 3.7        | ND                  | ND                     | ND      | ND   | No                   |
| 11      | Pos                      | Yes                    | 7.1        | 8.4        | 3.3        | 445       | 2.9        | ND                  | ND                     | ND      | ND   | No                   |

Abbreviations: Hgb Hemoglobin; Ca Calcium; Cr Creatinine; LDH Lactate dehydrogenase; Alb Albumin;  $\beta$ 2M Beta-2 macroglobulin; SPEP Serum protein electrophoresis; SFLC Serum free light chain ratio; UPEP Urine protein electrophoresis; ND Not determined; Pos Positive, Neg Negative

Table S3. Flow cytometric phenotyping of PBLs

| Case | CD138 | CD38 | CD10 | CD19 | CD20 | CD45 | CD56 | CD117 | s/c K/L | CD30 | cCD79a |
|------|-------|------|------|------|------|------|------|-------|---------|------|--------|
| 1    | +     | +    | -    | -    | -    | +    | -    |       | s- c L  |      | -      |
| 3    | +     |      | -    | -    | -    | -/+  | -    |       | s<c K   |      | +      |
| 4    | +     |      | +    | -    | -    | +    | +    | -     | s- c K  |      | -      |
| 6    | +     |      | -    | +    | -    | +    | -    | -     | s c K   |      | +      |
| 10   | +/-   | +    | +    | -    | -    | -/+  | -    | -     | c K     | -    | +/-    |
| 11   | +     |      | +    | -/+  | -    | -/+  | -/+  |       | s-      |      |        |

Abbreviations: s surface; c cytoplasmic
